# Supplementary material for: Selective engram coreactivation in idling brain inspires implicit learning
Source: PubMed Central journal article supplement — Proc Natl Acad Sci U S A. 2022 Aug 1;119(32):e2201578119. doi: 10.1073/pnas.2201578119 (PMC9371673; doi:10.1073/pnas.2201578119), 2022-08-01
Supplement: pnas.2201578119.sapp.pdf [file pnas.2201578119.sapp.pdf]

**Supplementary Information for:**

**Selective engram coreactivation in idling brain inspires  
implicit learning**

Mohamed H. Aly<sup>a,b,c,d,1</sup>, Kareem Abdou<sup>a,b,c,e,1</sup>, Reiko Okubo-Suzuki<sup>a,b,c</sup>, Masanori Nomoto<sup>a,b,c</sup>,  
Kaoru Inokuchi<sup>a,b,c</sup>

<sup>a</sup>Research Center for Idling Brain Science, University of Toyama, Toyama 930-0194, Japan

<sup>b</sup>Department of Biochemistry, Graduate School of Medicine and Pharmaceutical Sciences, University of Toyama, Toyama 930-0194, Japan

<sup>c</sup>CREST, JST, University of Toyama, Toyama 930-0194, Japan

<sup>d</sup>Pharmacology Department, Faculty of Pharmacy, The British University in Egypt, Cairo 11837, Egypt

<sup>e</sup>Department of Biochemistry, Faculty of Pharmacy, Cairo University, Cairo 11562, Egypt

<sup>1</sup>These authors contributed equally to this work.

Corresponding author:

Kaoru Inokuchi

Email: inokuchi@med.u-toyama.ac.jp

**This PDF file includes:**

Figures S1 to S6

Table S1

**Other supplementary materials for this manuscript include the following:**

Dataset for Figures 1 to 6, S1, S2, S3, S5, and S6.

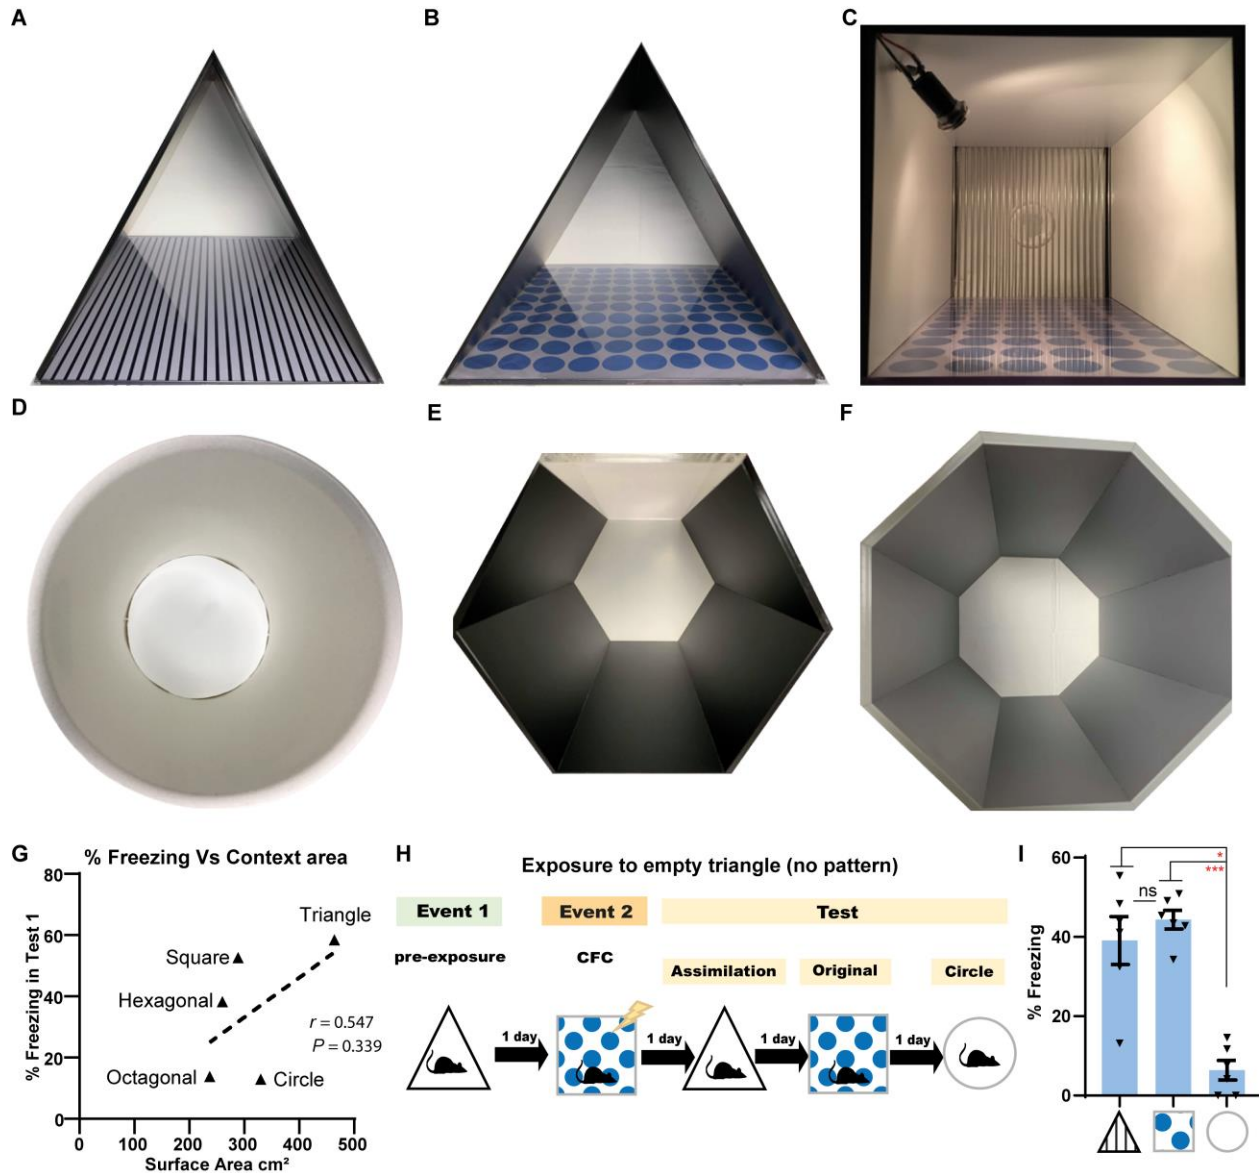

**Fig. S1. Characteristics of the contexts used in the study.** (*A and B*) Triangle-shaped prism context with two black walls, a plexiglass front covered from the outside with a white piece of paper showing either a black striped (*A*) or a blue circled (*B*) pattern, and a transparent acrylic floor placed on a white paper towel (Kim Towel, Kimberly-Clark, USA) (one side × height: 290 × 320 mm). (*C*) Square-shaped cubic context (width × depth × height: 175 × 165 × 300 mm) with three off-white sides, a plexiglass front covered from outside with a white piece of paper showing a blue circled pattern, and a flooring of 26 stainless steel rods with a diameter of 2 mm placed 5 mm apart. (*D*) Circle-shaped cylindrical context (diameter × height: 205 × 320 mm) with off-white walls and a white acrylic floor. (*E*) Hexagon-shaped context (one side × height: 100 × 300 mm) with five black walls, a plexiglass front covered from the outside with a white piece of paper, and a transparent acrylic floor placed on a white paper towel (Kim Towel, Kimberly-Clark, USA). (*F*) Octagon-shaped context with eight gray walls (one side × height: 70 × 300 mm) and a white acrylic

floor. All contexts were placed in exactly the same location during behavioral experiments. **(G)** Individual percent freezing during test in the E1 context, as in Fig. 1 *B*, and the surface area (cm<sup>2</sup>) for the testing contexts; Dashed black line, linear fit; Inset, Pearson's (r) value and *P*-value (two-tailed). **(H)** Experimental design. **(I)** Freezing levels during each Test. Data are presented as mean  $\pm$  SEM. *P*-values were determined using a one-way ANOVA followed by Tukey's multiple comparisons, \**P* < 0.05, \*\*\**P* < 0.001. ns, not significant (*P* > 0.05).

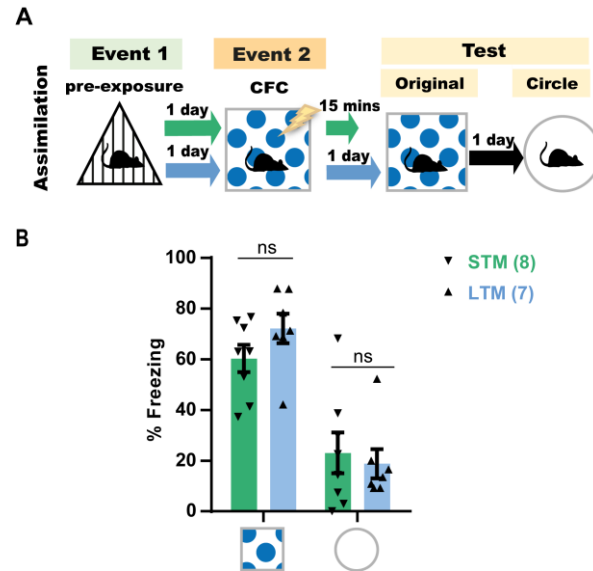

**Fig. S2. The original CFC memory shows no significant incubation-dependent difference in freezing between short-term and long-term testing intervals. (A), Experimental design. (B), Freezing levels during each test (4 min). *P*-values were determined using a two-way RM ANOVA followed by Sidak's multiple comparisons. Data are presented as mean  $\pm$  SEM. ns, not significant ( $P > 0.05$ ).**

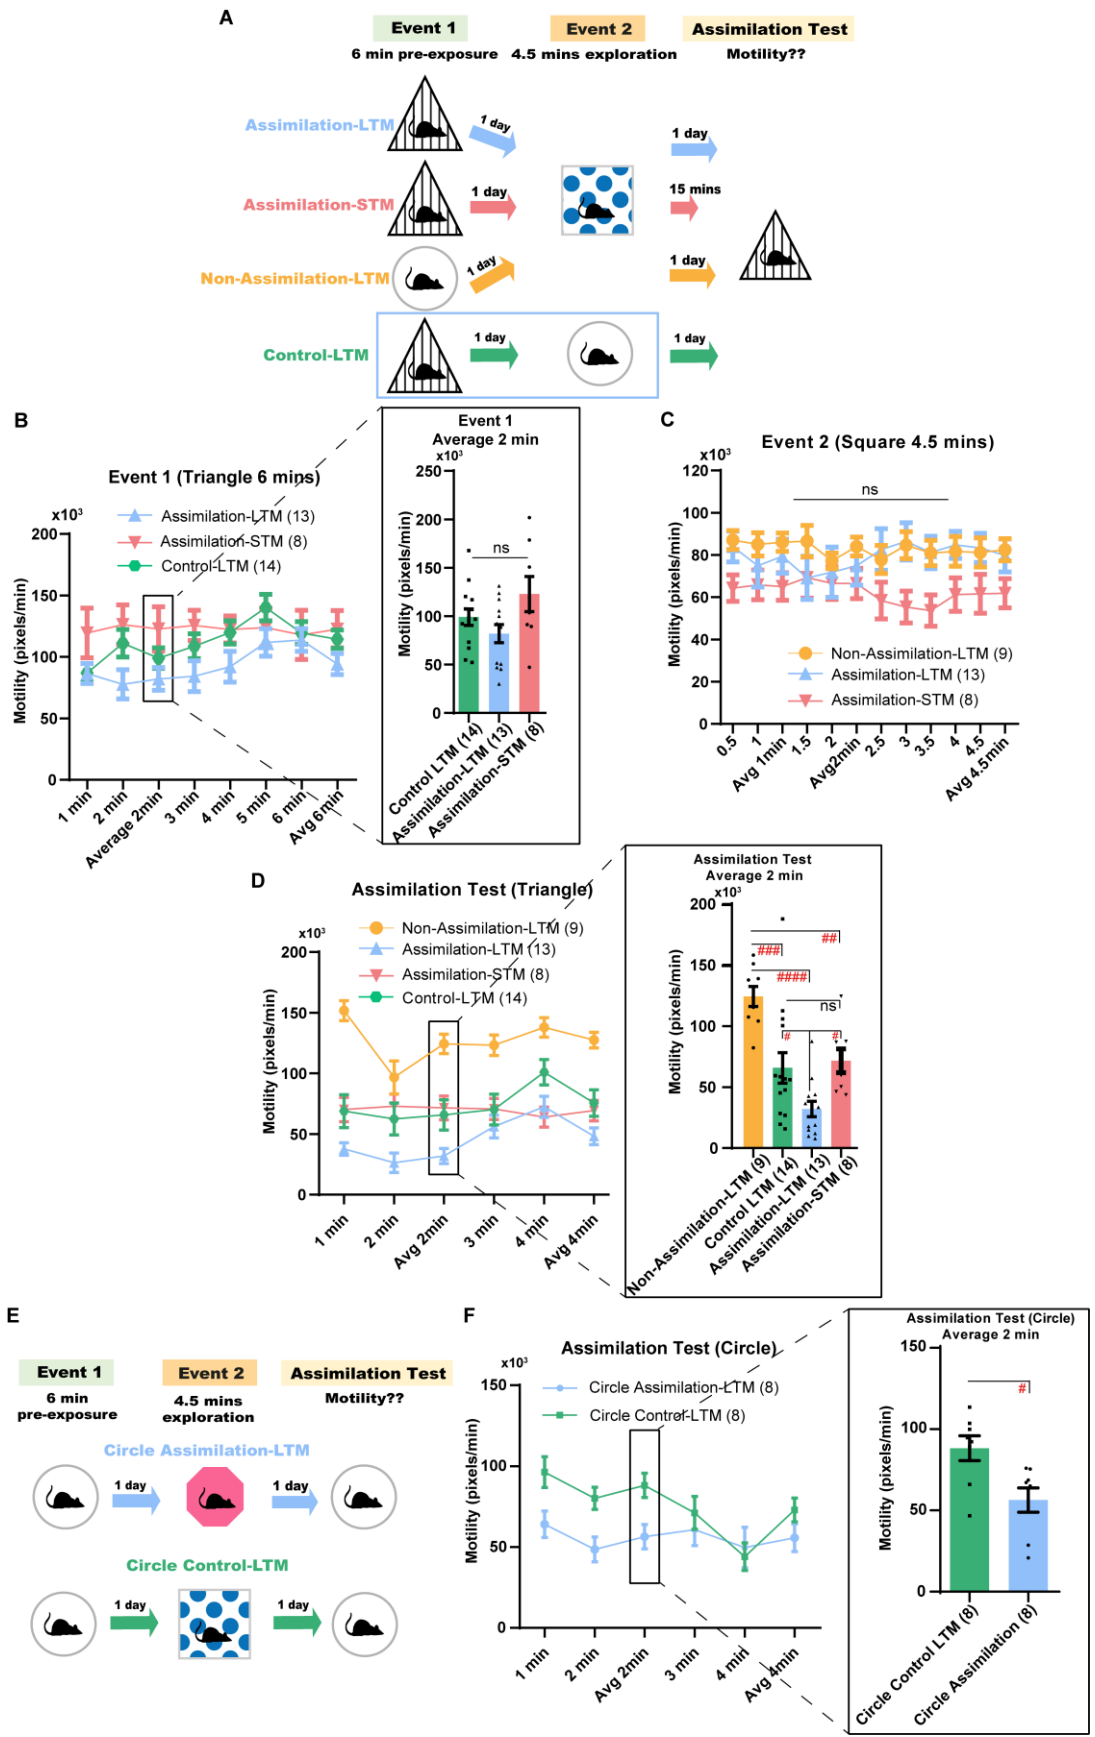

**Fig. S3. Pre-exposure to spatial commonalities induces offline assimilation of non-emotional memories.** (**A and E**) Experimental design. (**B**) Motility examined in 1-min intervals during Event 1 (6 min) in the triangle context (motility in circle pre-exposed group is not included in the comparison). Inset, average motility calculated for the first 2 min of pre-exposure session. *P*-values were determined using a one-way ANOVA followed by Tukey's multiple comparisons, ns, not significant ( $P > 0.05$ ). Data are presented as mean  $\pm$  SEM. (**C**) Motility was measured in 0.5-min intervals during Event 2 (4.5 min) in the square context for the assimilation and non-assimilation groups (motility in control-LTM group is not included in the comparison). *P*-values were determined using a two-way RM ANOVA followed by Sidak's multiple comparisons. ns, not significant ( $P > 0.05$ ). Data are presented as mean  $\pm$  SEM. (**D and F**) Motility examined in 1-min intervals during the test (4 min) in the triangle (**D**) or the circle (**F**) contexts. Inset, average motility calculated for the first 2 min of the test. *P*-values were determined using a one-way ANOVA followed by Holm-Sidak's multiple comparisons in (**D**) or using unpaired *t* test in (**F**),  $^{\#}P < 0.05$ ,  $^{\#\#}P < 0.01$ ,  $^{\#\#\#}P < 0.001$ ,  $^{\#\#\#\#}P < 0.0001$ . Data are presented as mean  $\pm$  SEM.

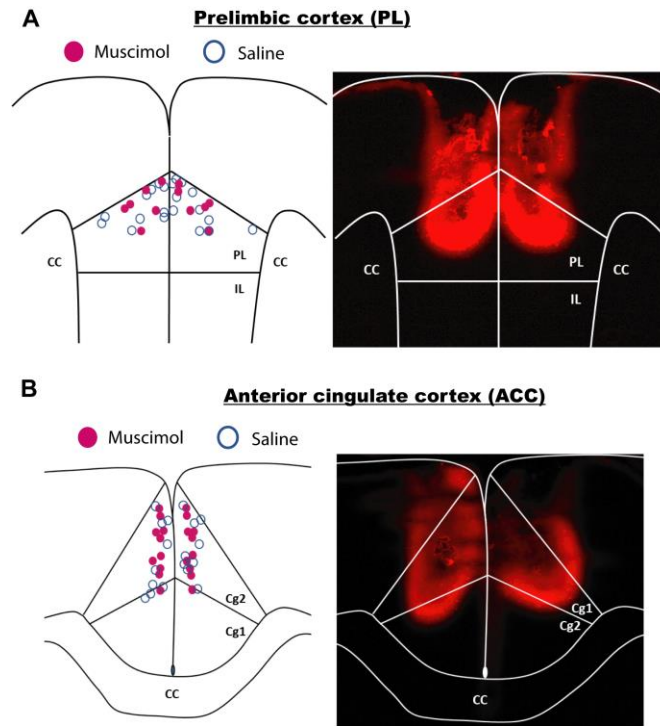

**Fig. S4. Drug injections into the ACC or PL.** (A) Left: Schematic diagram showing the center of each injection in the PL. Right: Schematic diagram showing representative rhodamine B staining in the PL. (B) Left: Schematic diagram showing the center of each injection in the ACC. Right: Schematic diagram showing representative rhodamine B staining in the ACC. IL, infralimbic cortex; CC, corpus callosum.

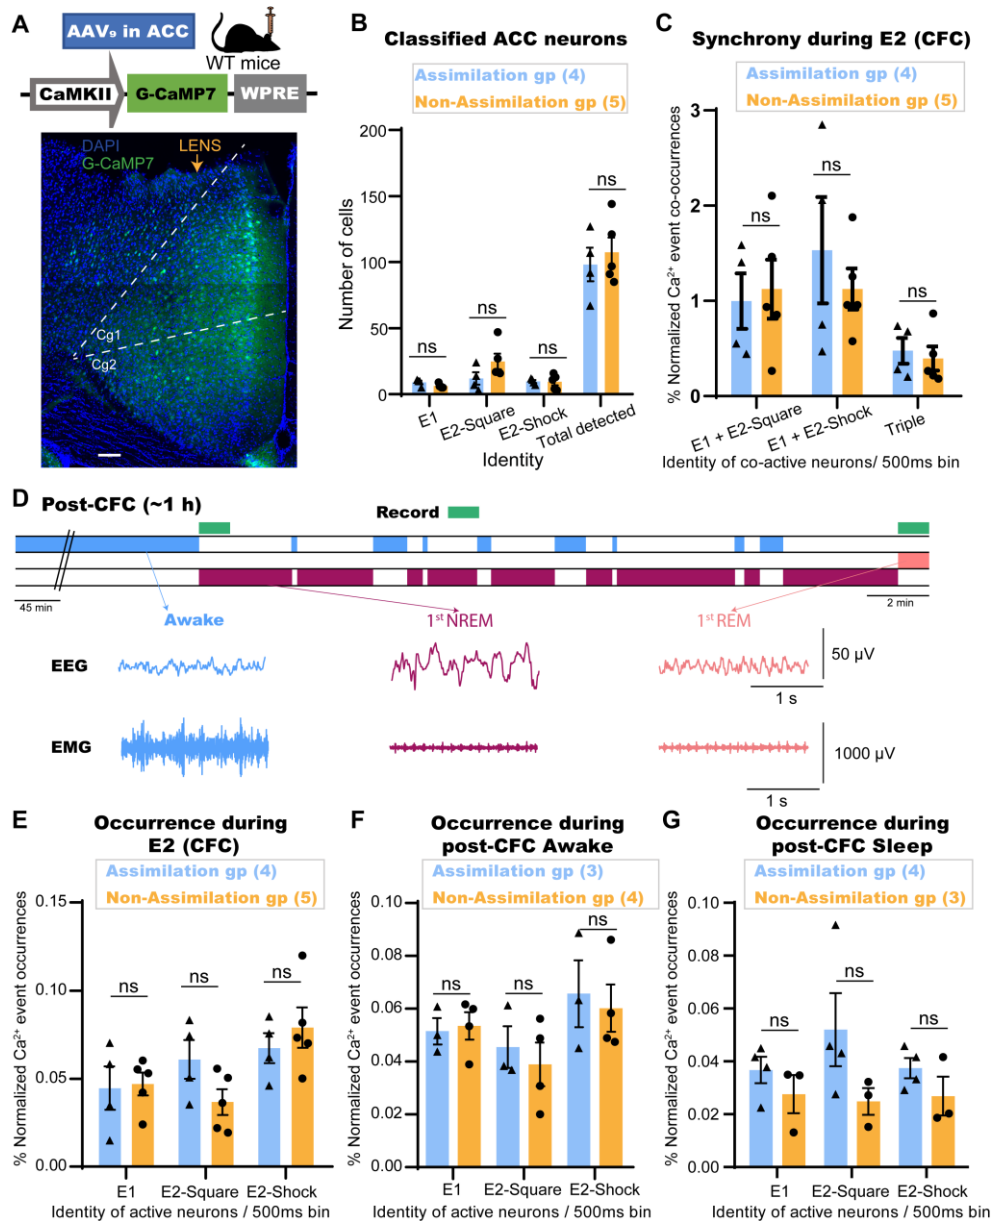

**Fig. S5. *In vivo* calcium imaging during offline memory assimilation task as well as awake/sleep stages detection during post-CFC offline session.** (A) Top: Design of AAV injected into the ACC. Bottom: Coronal section of the ACC showing G-CaMP7 protein expression and GRIN lens trace. Scale bar represents 100  $\mu\text{m}$ . (B) Averaged number of ACC cells classified as E1, E2-Square, or E2-Shock-responsive as well as mean total detected in each group. (C) % Normalized Ca<sup>2+</sup> event co-occurrences of E1-cells and E2-cells throughout the 2.5 min post-shock period in CFC training. (D), Top: Diagram for post-CFC stage-specific recording. Bottom: Example EEG and EMG recordings for each detected stage. (E-G), Single Ca<sup>2+</sup> event occurrences of E1- or E2- responsive cells throughout the 2.5 min post-shock period in CFC training (E), within 2-min post-CFC awake (F) or within 2-min post-CFC sleep (G). Data are presented as Mean  $\pm$  SEM in (B, C, and E-G). *P*-values were determined using unpaired *t* test. ns, not significant (*P* > 0.05).



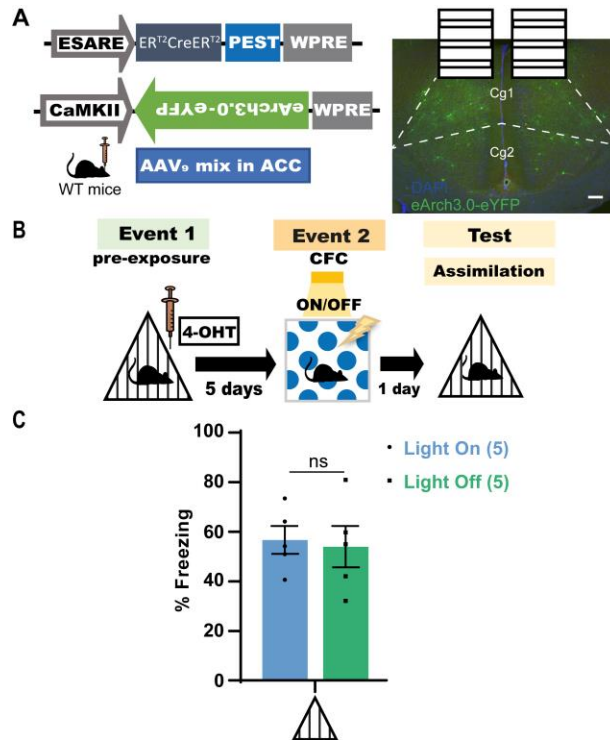

**Fig S6. Online ACC dynamics are dispensable for the assimilation.** (A) Left: Design of AAVs injected into the ACC for engram labeling. Right: Coronal section of the ACC showing eYFP protein expression in mice sacrificed after test session. Dashed lines show the boundary of the ACC. Scale bar represents 100  $\mu$ m. ER<sup>T2</sup>CreER<sup>T2</sup>, tamoxifen-inducible recombinase; eYFP, enhanced yellow fluorescent protein; DAPI, 4',6-diamidino-2-phenylindole; Cg1, cingulate cortex, area 1; Cg2, cingulate cortex, area 2; 4-OHT, 4-hydroxytamoxifen. (B) Experimental design. ON; laser ON group; OFF, laser OFF group. (C), Freezing levels during the test session. Graph shows mean  $\pm$  SEM. *P*-values were determined using unpaired *t* test; ns, not significant (*P* > 0.05).

Table S1| Sampling and statistical analysis details

| Fig. #                           | Group                 | Sample size    |                   | Mean $\pm$ SEM                                                       | Statistical test             | Degree of freedom & F/t value            | p-value    | Significance |
|----------------------------------|-----------------------|----------------|-------------------|----------------------------------------------------------------------|------------------------------|------------------------------------------|------------|--------------|
|                                  |                       | Exact size (n) | Excluded size (n) |                                                                      |                              |                                          |            |              |
| 1 B                              | Triangle              | 11             | 0                 | E1, 14.8 $\pm$ 4.73, T1, 58.5 $\pm$ 6.09; T2, 56.3 $\pm$ 2.9         | Two-way RM ANOVA             | Interaction F (6, 78) = 8.791            | P < 0.0001 | ****         |
|                                  | Hexagon               | 11             | 0                 | E1, 2.1 $\pm$ 0.68, T1, 38.3 $\pm$ 5.4; T2, 51 $\pm$ 4.77            |                              | Session F (2, 78) = 172.2                |            |              |
|                                  | Octagon               | 11             | 0                 | E1, 0.97 $\pm$ 0.38, T1, 13.9 $\pm$ 3.86; T2, 52.3 $\pm$ 3.65        |                              | pre-exposure condition F (3, 39) = 13.62 |            |              |
|                                  | Circle                | 10             | 0                 | E1, 2.38 $\pm$ 0.88, T1, 12.9 $\pm$ 2.86; T2, 50.7 $\pm$ 5.76        |                              |                                          |            |              |
| 1 C                              | Triangle              | 11             | 0                 | delta % freezing, 43.7 $\pm$ 5.2                                     | One-way ANOVA                | F (3, 39) = 13.4                         | P < 0.0001 | ****         |
|                                  | Hexagon               | 11             | 0                 | delta % freezing, 36.21 $\pm$ 5.33                                   |                              |                                          |            |              |
|                                  | Octagon               | 11             | 0                 | delta % freezing, 12.88 $\pm$ 4.1                                    |                              |                                          |            |              |
|                                  | Circle                | 10             | 0                 | delta % freezing, 10.54 $\pm$ 2.8                                    |                              |                                          |            |              |
| 1 E                              | No Pre-exposure- 1day | 8              | 0                 | T1, 12.33 $\pm$ 3.45; T2, 40.042 $\pm$ 5.65 ; T3, 8.417 $\pm$ 2.39   | Two-way RM ANOVA             | Interaction F (6, 96) = 7.552            | P < 0.0001 | ****         |
|                                  | NonAssimilation-1day  | 20             | 0                 | T1, 18.57 $\pm$ 3.17; T2, 40.56 $\pm$ 4.01; T3, 10.99 $\pm$ 2.29     |                              | Session F (2, 96) = 91.05                | P < 0.0001 | ****         |
|                                  | Assimilation-1day     | 15             | 0                 | T1, 46.29 $\pm$ 5.32; T2, 51.43 $\pm$ 5.72; T3, 16.31 $\pm$ 3.58     |                              | pre-exposure condition F (3, 48) = 9.047 | P < 0.0001 | ****         |
|                                  | Assimilation-5day     | 9              | 0                 | T1, 61.35 $\pm$ 7.898; T2, 58.25 $\pm$ 5.64; T3, 13.96 $\pm$ 5.36    |                              |                                          |            |              |
| 2 B                              | Subtle -STM           | 15             | 0                 | T1, 29.5 $\pm$ 4.78; T2, 50.31 $\pm$ 5.66; T3, 11.57 $\pm$ 3.35      | Two-way RM ANOVA             | Interaction F (6, 102) = 7.457           | P < 0.0001 | ****         |
|                                  | Obvious -STM          | 15             | 0                 | T1, 54.34 $\pm$ 4.31; T2, 62.07 $\pm$ 4.91; T3, 7.47 $\pm$ 1.80      |                              | Session F (2, 102) = 130.0               | P < 0.0001 | ****         |
|                                  | Subtle -LTM           | 13             | 0                 | T1, 60.21 $\pm$ 4.6; T2, 53.15 $\pm$ 5.17; T3, 10.82 $\pm$ 3.09      |                              | pre-exposure condition F (3, 51) = 2.577 | P = 0.0638 | ns           |
|                                  | Non-Assimilation-STM  | 12             | 0                 | T1, 26.04 $\pm$ 6.02; T2, 57.47 $\pm$ 8.11; T3, 16.25 $\pm$ 4.25     |                              |                                          |            |              |
| 3 B                              | Muscimol              | 6              | 2                 | T1, 66.08 $\pm$ 8.76; T2, 24.25 $\pm$ 5.15; T3, 18.22 $\pm$ 8.77     | Two-way RM ANOVA             | Interaction F (2, 28) = 8.585            | P = 0.0012 | **           |
|                                  | Saline                | 10             | 0                 | T1, 56.88 $\pm$ 6.36; T2, 55.61 $\pm$ 7.18; T3, 16.09 $\pm$ 4.06     |                              | Session F (2, 28) = 35.95                | P < 0.0001 | ****         |
|                                  |                       |                |                   |                                                                      |                              | Injection condition F (1, 14) = 0.7451   | P = 0.4026 | ns           |
| 3 C                              | Muscimol              | 10             | 0                 | T1, 21.14 $\pm$ 6.41; T2, 16.83 $\pm$ 5.81; T3, 3.65 $\pm$ 1.01      | Two-way RM ANOVA             | Interaction F (2, 34) = 1.856            | P = 0.1718 | ns           |
|                                  | Saline                | 9              | 0                 | T1, 52.34 $\pm$ 6.34; T2, 47.58 $\pm$ 8.08; T3, 19.97 $\pm$ 7.61     |                              | Session F (2, 34) = 18.27                | P < 0.0001 | ****         |
|                                  |                       |                |                   |                                                                      |                              | Injection condition F (1, 17) = 13.29    | P = 0.0020 | **           |
| 4 B, Freezing behavior           | Assimilation          | 4              | 0                 | T1, 61.88 $\pm$ 7.551; T2, 73.75 $\pm$ 4.491; T3, 22.92 $\pm$ 8.297  | Two-way RM ANOVA             | Interaction F (2, 10) = 5.956            | P = 0.0198 | *            |
|                                  | Non-Assimilation      | 3              | 0                 | T1, 30.42 $\pm$ 4.174; T2, 66.67 $\pm$ 10.026; T3, 22.64 $\pm$ 4.204 |                              | Session F (2, 10) = 49.75                | P < 0.0001 | ****         |
|                                  |                       |                |                   |                                                                      |                              | pre-exposure condition F (1, 5) = 2.409  | P = 0.1813 | ns           |
| 4 D, Single occurrence (Test)    | Assimilation          | 4              | 0                 | % Normalized E1, 0.05 $\pm$ 0.005                                    | Unpaired t test (Two-tailed) | t=0.2877 df=5                            | P = 0.7851 | ns           |
|                                  | Non-Assimilation      | 3              | 0                 | % Normalized E1, 0.05 $\pm$ 0.017                                    |                              |                                          |            |              |
|                                  | Assimilation          | 4              | 0                 | % Normalized E2-Shock, 0.04 $\pm$ 0.005                              | Unpaired t test (Two-tailed) | t=0.3150 df=5                            | P = 0.7655 | ns           |
|                                  | Non-Assimilation      | 3              | 0                 | % Normalized E2-Shock, 0.04 $\pm$ 0.009                              |                              |                                          |            |              |
| 4 E, Synchrony in Test           | Assimilation          | 4              | 0                 | % Normalized E1 + E2-Shock, 0.99 $\pm$ 0.173                         | Unpaired t test (One-tailed) | t=2.017 df=5                             | P = 0.0499 | *            |
|                                  | Non-Assimilation      | 3              | 0                 | % Normalized E1 + E2-Shock, 0.53 $\pm$ 0.123                         |                              |                                          |            |              |
| 5 B, Synchrony in Post-CFC Awake | Assimilation          | 3              | 0                 | % Normalized E1 + E2-Square, 0.95 $\pm$ 0.144                        | Unpaired t test (One-tailed) | t=2.059 df=5                             | P = 0.0473 | *            |
|                                  | Non-Assimilation      | 4              | 0                 | % Normalized E1 + E2-Square, 1.39 $\pm$ 0.462                        |                              |                                          |            |              |
|                                  | Assimilation          | 3              | 0                 | % Normalized E1 + E2-Shock, 1.44 $\pm$ 0.31                          | Unpaired t test (One-tailed) | t=3.019 df=5                             | P = 0.0147 | *            |
|                                  | Non-Assimilation      | 4              | 0                 | % Normalized E1 + E2-Shock, 1.07 $\pm$ 0.343                         |                              |                                          |            |              |
|                                  | Assimilation          | 3              | 0                 | % Normalized Triple, 0.433 $\pm$ 0.042                               | Unpaired t test (One-tailed) | t=4.791 df=5                             | P = 0.0025 | *            |
|                                  | Non-Assimilation      | 4              | 0                 | % Normalized Triple, 0.45 $\pm$ 0.21                                 |                              |                                          |            |              |
|                                  | Assimilation          | 3              | 0                 | % Normalized E2-Square + E2-Shock, 1.64 $\pm$ 0.243                  | Unpaired t test (One-tailed) | t=1.725 df=5                             | P = 0.0726 | ns           |
|                                  | Non-Assimilation      | 4              | 0                 | % Normalized E2-Square + E2-Shock, 1.22 $\pm$ 0.35                   |                              |                                          |            |              |
| 5 C, Synchrony in Post-CFC Sleep | Assimilation          | 4              | 0                 | % Normalized E1 + E2-Square, 0.81 $\pm$ 0.118                        | Unpaired t test (One-tailed) | t=2.059 df=5                             | P = 0.0473 | *            |
|                                  | Non-Assimilation      | 3              | 0                 | % Normalized E1 + E2-Square, 0.43 $\pm$ 0.141                        |                              |                                          |            |              |

|                  |                             |    |                                                 |                                                                                                                                                                                                                                                                                                                                                              |                              |                                           |            |      |
|------------------|-----------------------------|----|-------------------------------------------------|--------------------------------------------------------------------------------------------------------------------------------------------------------------------------------------------------------------------------------------------------------------------------------------------------------------------------------------------------------------|------------------------------|-------------------------------------------|------------|------|
|                  | Assimilation                | 4  | 0                                               | % Normalized E1 + E2-Shock, 0.83 ± 0.159                                                                                                                                                                                                                                                                                                                     | Unpaired t test (One-tailed) | t=3.019 df=5                              | P = 0.0147 | *    |
|                  | Non-Assimilation            | 3  | 0                                               | % Normalized E1 + E2-Shock, 0.25 ± 0.057                                                                                                                                                                                                                                                                                                                     |                              |                                           |            |      |
|                  | Assimilation                | 4  | 0                                               | % Normalized Triple, 0.32 ± 0.045                                                                                                                                                                                                                                                                                                                            | Unpaired t test (One-tailed) | t=4.791 df=5                              | P = 0.0025 | *    |
|                  | Non-Assimilation            | 3  | 0                                               | % Normalized Triple, 0.06 ± 0.014                                                                                                                                                                                                                                                                                                                            |                              |                                           |            |      |
|                  | Assimilation                | 4  | 0                                               | % Normalized E2-Square + E2-Shock, 1.09 ± 0.161                                                                                                                                                                                                                                                                                                              | Unpaired t test (One-tailed) | t=1.725 df=5                              | P = 0.0726 | ns   |
| Non-Assimilation | 3                           | 0  | % Normalized E2-Square + E2-Shock, 0.62 ± 0.239 |                                                                                                                                                                                                                                                                                                                                                              |                              |                                           |            |      |
| 6 D, Left        | Light On + 4-OHT            | 9  | 0                                               | T1, 29.72 ± 4.662; T2, 49.2 ± 7.19                                                                                                                                                                                                                                                                                                                           | Two-way RM ANOVA             | Interaction F (2, 23) = 6.208             | P = 0.0070 | **   |
|                  | Light On + VEH              | 9  | 0                                               | T1, 57.6 ± 5.346; T2, 45.34 ± 2.634                                                                                                                                                                                                                                                                                                                          |                              | Session F (1, 23) = 0.1513                | P = 0.7009 | ns   |
|                  | Light Off + 4-OHT           | 8  | 0                                               | T1, 62.57 ± 8.3; T2, 50.35 ± 4.89                                                                                                                                                                                                                                                                                                                            |                              | Pre-exposure condition F (2, 23) = 4.015  | P = 0.0319 | *    |
| 6 D, Middle      | Light On + 4-OHT            | 9  | 0                                               | NREM, 6652.78 ± 360.460; REM, 395.89 ± 70.618                                                                                                                                                                                                                                                                                                                | Two-way RM ANOVA             | Interaction F (1, 16) = 0.7369            | P = 0.4033 | ns   |
|                  | Light On + VEH              | 9  | 0                                               | NREM, 6250.56 ± 422.321; REM, 463 ± 71.993                                                                                                                                                                                                                                                                                                                   |                              | Sleep stage F (1, 16) = 485.3             | P < 0.0001 | **** |
|                  |                             |    |                                                 |                                                                                                                                                                                                                                                                                                                                                              |                              | Pre-exposure condition F (1, 16) = 0.3323 | P = 0.5724 | ns   |
| 6 D, Right       | Light On + 4-OHT            | 9  | 0                                               | NREM, 50.35 ± 2.782; REM, 3.06 ± 0.576; Awake, 46.6 ± 2.864                                                                                                                                                                                                                                                                                                  | Two-way RM ANOVA             | Interaction F (2, 32) = 0.1652            | P = 0.8484 | ns   |
|                  | Light On + VEH              | 9  | 0                                               | NREM, 51.41 ± 2.317; REM, 3.73 ± 0.474; Awake, 44.864 ± 2.422                                                                                                                                                                                                                                                                                                |                              | Sleep stage F (2, 32) = 195.8             | P < 0.0001 | **** |
|                  |                             |    |                                                 |                                                                                                                                                                                                                                                                                                                                                              |                              | Pre-exposure condition F (1, 16) = 0.1171 | P = 0.7366 | ns   |
| Fig. S1 G        | Triangle                    | 11 | 0                                               | T1, 58.5 ± 6.09; Area, 464 cm <sup>2</sup> .                                                                                                                                                                                                                                                                                                                 | Pearson's correlation        | r = 0.547                                 | P = 0.339  | ns   |
|                  | Hexagon                     | 11 | 0                                               | T1, 38.3 ± 5.4; Area, 260 cm <sup>2</sup> .                                                                                                                                                                                                                                                                                                                  |                              |                                           |            |      |
|                  | Octagon                     | 11 | 0                                               | T1, 13.9 ± 3.86; Area, 237 cm <sup>2</sup> .                                                                                                                                                                                                                                                                                                                 |                              |                                           |            |      |
|                  | Circle                      | 10 | 0                                               | T1, 12.9 ± 2.86; Area, 330 cm <sup>2</sup> .                                                                                                                                                                                                                                                                                                                 |                              |                                           |            |      |
|                  | Square                      | 43 | 0                                               | T2, 52.6 ± 2.12; Area, 289 cm <sup>2</sup> .                                                                                                                                                                                                                                                                                                                 |                              |                                           |            |      |
| Fig. S1 I        | Empty Triangle (no Pattern) | 6  | 0                                               | T1, 39.12 ± 6.05; T2, 44.38 ± 2.385; T3, 6.39 ± 2.48                                                                                                                                                                                                                                                                                                         | One-way ANOVA                | Session F (1.228, 6.142) = 19.37          | P=0.0035   | **   |
| Fig. S2 B        | STM                         | 8  | 0                                               | T1, 60.32 ± 5.34; T2, 23.04 ± 8.01                                                                                                                                                                                                                                                                                                                           | Two-way RM ANOVA             | Interaction F (1, 13) = 2.295             | P = 0.1537 | ns   |
|                  | LTM                         | 7  | 0                                               | T1, 72.19 ± 5.88; T2, 18.79 ± 6.83                                                                                                                                                                                                                                                                                                                           |                              | Session F (1, 13) = 72.54                 | P < 0.0001 | **** |
|                  |                             |    |                                                 |                                                                                                                                                                                                                                                                                                                                                              |                              | Condition F (1, 13) = 0.2661              | P = 0.6146 | ns   |
| Fig. S3 B        | Control-LTM                 | 14 | 0                                               | Average (2min), 99065 ± 8463                                                                                                                                                                                                                                                                                                                                 | One-way ANOVA                | F (2, 32) = 2.942                         | P = 0.0672 | ns   |
|                  | Assimilation-LTM            | 13 | 0                                               | Average (2min), 81999 ± 9357                                                                                                                                                                                                                                                                                                                                 |                              |                                           |            |      |
|                  | Assimilation-STM            | 8  | 0                                               | Average (2min), 122840 ± 18096                                                                                                                                                                                                                                                                                                                               |                              |                                           |            |      |
| Fig. S3 C        | Assimilation-STM            | 8  | 0                                               | 0.5 min, 64235.3 ± 6324; 1 min, 65792.6 ± 7021.32; Avg 1 min, 65013.9 ± 6557.43; 1.5min, 69248.3 ± 9730.15; 2 min, 66611.6 ± 7706.07; Avg 2 min, 66471.9 ± 7232.47; 2.5 min, 58387.1 ± 8677.3; 3 min, 55344.9 ± 7618.9; 3.5 min, 53660.3 ± 7427.09; 4 min, 61262.9 ± 7982.82; 4.5 min, 61645.4 ± 9242.75; Avg 4.5 min, 61798.7 ± 6909.01                     | Two-way RM ANOVA             | Interaction F (22, 297) = 1.717           | P = 0.0253 | *    |
|                  | Non-Assimilation-LTM        | 9  | 0                                               | 0.5 min, 87107.11 ± 4555.62; 1 min, 85027.56 ± 5502.74; Avg 1 min, 86067.33 ± 4388.12; 1.5min, 86578.22 ± 7389.47; 2 min, 77266.67 ± 3819.37; Avg 2 min, 83994.89 ± 4535.55; 2.5 min, 77882.45 ± 6679.07; 3 min, 84657.78 ± 6489.92; 3.5 min, 80864.22 ± 6096.74; 4 min, 81684 ± 7084.26; 4.5 min, 81192.67 ± 6911.91; Avg 4.5 min, 82473.41 ± 5257.35       |                              | Session F (11, 297) = 0.6624              | P = 0.7737 | ns   |
|                  | Assimilation-LTM            | 13 | 0                                               | 0.5 min, 83959.08 ± 7351.79; 1 min, 74867.85 ± 10176.71; Avg 1 min, 79413.46 ± 8150.93; 1.5min, 69135.69 ± 10294.73; 2 min, 71832.39 ± 11925.19; Avg 2 min, 74948.75 ± 9292.93; 2.5 min, 82601.15 ± 9841.19; 3 min, 86400.69 ± 8842.49; 3.5 min, 81211.39 ± 7688.99; 4 min, 84763.62 ± 6343.98; 4.5 min, 83348.08 ± 6964.71; Avg 4.5 min, 79791.10 ± 7829.41 |                              | pre-exposure condition F (2, 27) = 1.939  | P = 0.1633 | ns   |

|                                                    |                         |    |   |                                           |                              |                  |            |      |
|----------------------------------------------------|-------------------------|----|---|-------------------------------------------|------------------------------|------------------|------------|------|
| Fig. S3 D                                          | Non-Assimilation-LTM    | 9  | 0 | Average (2min), 124279 ± 8159             | One-way ANOVA                | F (3, 40) = 13.6 | P < 0.0001 | **** |
|                                                    | Control-LTM             | 14 | 0 | Average (2min), 65754 ± 12499             |                              |                  |            |      |
|                                                    | Assimilation-LTM        | 13 | 0 | Average (2min), 32065 ± 6277              |                              |                  |            |      |
|                                                    | Assimilation-STM        | 8  | 0 | Average (2min), 71625.9 ± 9719            |                              |                  |            |      |
| Fig. S3 F                                          | Circle Assimilation-LTM | 8  | 0 | Average (2min), 56330.75 ± 7526.53        | Unpaired t test (Two-tailed) | t=2.967, df=14   | P = 0.0102 | *    |
|                                                    | Circle Control-LTM      | 8  | 0 | Average (2min), 88172.56 ± 7652.5         |                              |                  |            |      |
| Fig. S5 B, Number of classified/detected ACC cells | Assimilation            | 4  | 0 | E1, 9.00 ± 1.354                          | Unpaired t test (Two-tailed) | t=1.928, df=7    | P = 0.0952 | ns   |
|                                                    | Non-Assimilation        | 5  | 0 | E1, 8.8 ± 1.5                             |                              |                  |            |      |
|                                                    | Assimilation            | 4  | 0 | E2-Square, 12.00 ± 4.601                  | Unpaired t test (Two-tailed) | t=1.637, df=7    | P = 0.1456 | ns   |
|                                                    | Non-Assimilation        | 5  | 0 | E2-Square, 24.8 ± 5.9                     |                              |                  |            |      |
|                                                    | Assimilation            | 4  | 0 | E2-Shock, 9.75 ± 1.109                    | Unpaired t test (Two-tailed) | t=0.1151, df=7   | P = 0.9116 | ns   |
|                                                    | Non-Assimilation        | 5  | 0 | E2-Shock, 6.8 ± 2.35                      |                              |                  |            |      |
|                                                    | Assimilation            | 4  | 0 | Total detected, 98.25 ± 12.64             | Unpaired t test (Two-tailed) | t=0.5609, df=7   | P = 0.5923 | ns   |
|                                                    | Non-Assimilation        | 5  | 0 | Total detected, 107.6 ± 10.96             |                              |                  |            |      |
| Fig. S5 C, Synchrony in CFC                        | Assimilation            | 4  | 0 | % Normalized E1 + E2-Square, 0.99 ± 0.292 | Unpaired t test (One-tailed) | t=0.2923, df=7   | P = 0.3893 | ns   |
|                                                    | Non-Assimilation        | 5  | 0 | % Normalized E1 + E2-Square, 1.12 ± 0.31  |                              |                  |            |      |
|                                                    | Assimilation            | 4  | 0 | % Normalized E1 + E2-Shock, 1.53 ± 0.559  | Unpaired t test (One-tailed) | t=0.7407, df=7   | P = 0.2415 | ns   |
|                                                    | Non-Assimilation        | 5  | 0 | % Normalized E1 + E2-Shock, 1.13 ± 0.22   |                              |                  |            |      |
|                                                    | Assimilation            | 4  | 0 | % Normalized Triple, 0.48 ± 0.136         | Unpaired t test (One-tailed) | t=0.4329, df=7   | P = 0.3391 | ns   |
|                                                    | Non-Assimilation        | 5  | 0 | % Normalized Triple, 0.4 ± 0.126          |                              |                  |            |      |
| Fig. S5 E, Single occurrence (CFC)                 | Assimilation            | 4  | 0 | % Normalized E1, 0.05 ± 0.012             | Unpaired t test (Two-tailed) | t=0.1819, df=7   | P = 0.8608 | ns   |
|                                                    | Non-Assimilation        | 5  | 0 | % Normalized E1, 0.05 ± 0.006             |                              |                  |            |      |
|                                                    | Assimilation            | 4  | 0 | % Normalized E2-Square, 0.06 ± 0.011      | Unpaired t test (Two-tailed) | t=1.906, df=7    | P = 0.0983 | ns   |
|                                                    | Non-Assimilation        | 5  | 0 | % Normalized E2-Square, 0.04 ± 0.007      |                              |                  |            |      |
|                                                    | Assimilation            | 4  | 0 | % Normalized E2-Shock, 0.07 ± 0.009       | Unpaired t test (Two-tailed) | t=0.7820, df=7   | P = 0.4598 | ns   |
|                                                    | Non-Assimilation        | 5  | 0 | % Normalized E2-Shock, 0.08 ± 0.012       |                              |                  |            |      |
| Fig. S5 F, Single occurrence (Post-CFC Awake)      | Assimilation            | 3  | 0 | % Normalized E1, 0.05 ± 0.005             | Unpaired t test (Two-tailed) | t=0.2627, df=5   | P = 0.8032 | ns   |
|                                                    | Non-Assimilation        | 4  | 0 | % Normalized E1, 0.05 ± 0.005             |                              |                  |            |      |
|                                                    | Assimilation            | 3  | 0 | % Normalized E2-Square, 0.05 ± 0.008      | Unpaired t test (Two-tailed) | t=0.5524, df=5   | P = 0.6045 | ns   |
|                                                    | Non-Assimilation        | 4  | 0 | % Normalized E2-Square, 0.04 ± 0.008      |                              |                  |            |      |
|                                                    | Assimilation            | 3  | 0 | % Normalized E2-Shock, 0.07 ± 0.013       | Unpaired t test (Two-tailed) | t=0.3655, df=5   | P = 0.7297 | ns   |
|                                                    | Non-Assimilation        | 4  | 0 | % Normalized E2-Shock, 0.06 ± 0.009       |                              |                  |            |      |
| Fig. S5 G, Single occurrence (Post-CFC Sleep)      | Assimilation            | 4  | 0 | % Normalized E1, 0.04 ± 0.005             | Unpaired t test (Two-tailed) | t=1.082 df=5     | P = 0.3287 | ns   |
|                                                    | Non-Assimilation        | 3  | 0 | % Normalized E1, 0.03 ± 0.007             |                              |                  |            |      |
|                                                    | Assimilation            | 4  | 0 | % Normalized E2-Square, 0.05 ± 0.014      | Unpaired t test (Two-tailed) | t=1.611 df=5     | P = 0.1682 | ns   |
|                                                    | Non-Assimilation        | 3  | 0 | % Normalized E2-Square, 0.025 ± 0.005     |                              |                  |            |      |
|                                                    | Assimilation            | 4  | 0 | % Normalized E2-Shock, 0.04 ± 0.004       | Unpaired t test (Two-tailed) | t=1.385 df=5     | P = 0.2248 | ns   |
|                                                    | Non-Assimilation        | 3  | 0 | % Normalized E2-Shock, 0.03 ± 0.007       |                              |                  |            |      |
| Fig. S6 C                                          | Light ON                | 5  | 0 | T, 56.675 ± 5.63                          | Unpaired t test (Two-tailed) | t=0.2698 df=8    | P = 0.7942 | ns   |
|                                                    | Light OFF               | 5  | 0 | T, 53.967 ± 8.311                         |                              |                  |            |      |

**Dataset for Figures 1 to 6, S1, S2, S3, S5, and S6 (separate file).**
